# Supplementary material for: Electrocardiographic Parameters Associated with Adverse Outcomes in Children with Cardiomyopathies
Source: MDPI journal article supplement (doi:10.3390/jcm11236930), 2022-11-24
Supplement: s1 [file s1]

## Supplementary materials

**Table S1.** Differences in the baseline ECG, echocardiographic parameters, adverse events occurrence among HCM, DCM and LVNC patients.

|                              | DCM                | HCM                | LVNC               | p-value           |
|------------------------------|--------------------|--------------------|--------------------|-------------------|
| HR [bpm]                     | 97.2 ± 28.89       | 89.1 ± 26.22       | 79.0 ± 23.07       | 0.337             |
| PQ [ms]                      | 128.9 ± 22.83      | 135.3 ± 23.48      | 133.3 ± 16.33      | 0.693             |
| QRS [ms]                     | 80 (70-80)         | 70 (70-100)        | 85 (80-98)         | 0.241             |
| QRS-T [°]                    | 75.2 ± 46.50       | 99.6 ± 33.86       | 64.1 ± 16.99       | 0.107             |
| QTc_mean [ms]                | 404.9 ± 37.56      | 416.3 ± 31.80      | 420.9 ± 22.43      | 0.471             |
| LA enlargement (n)           | 2 (12%)            | 3 (16%)            | 1 (17%)            | 0.817             |
| RA enlargement (n)           | 0                  | 3 (18%)            | 2 (33%)            | 0.057             |
| RVH (n)                      | 0                  | 0                  | 0                  | X                 |
| LVH (n)                      | 2 (11%)            | 5 (29%)            | 0                  | 0.157             |
| Fragmented QRS (n)           | 8 (42%)            | 5 (29%)            | 1 (20%)            | 0.563             |
| Negative T-wave ≥2 leads (n) | 4 (21%)            | 7 (44%)            | 0 (0%)             | 0.113             |
| RBBB (n)                     | 0                  | 0                  | 1 (16.7%)          | <b>0.046</b>      |
| LBBB (n)                     | 1 (5%)             | 1 (6%)             | 0                  | 0.836             |
| LVEF (%)                     | 40 (12 – 47)       | 61 (21 – 65)       | 55.5 (51 – 56)     | <b>&lt; 0.001</b> |
| LVIDd z-score                | 3.70 ± 1.50        | -1.82 ± 1.86       | 0.75 ± 0.73        | <b>&lt; 0.001</b> |
| LVWPD z-score                | 0.57 (0.14 – 0.92) | 3.40 (2.00 – 5.40) | 1.05 (0.03 – 1.55) | <b>&lt; 0.001</b> |
| IVSd z-score                 | 0.57 ± 0.69        | 9.20 ± 5.06        | 0.50 ± 1.01        | <b>&lt; 0.001</b> |
| VT (n)                       | 4 (21%)            | 4 (24%)            | 0 (0%)             | 0.431             |
| ICD (n)                      | 2 (11%)            | 5 (29%)            | 0 (0%)             | 0.157             |
| HTx (n)                      | 6 (32%)            | 1 (6%)             | 1 (17%)            | 0.145             |
| LVAD (n)                     | 3 (16%)            | 0 (0%)             | 0 (0%)             | 0.142             |
| Death (n)                    | 2 (11%)            | 0 (0%)             | 0 (0%)             | 0.281             |
| All end points (n)           | 6 (32%)            | 6 (35%)            | 1 (17%)            | 0.696             |

Data are presented as median and IQR in parenthesis or mean and standard deviation (±) or percentages, *n* – number of patients; DCM- dilated cardiomyopathy, HCM – hypertrophic cardiomyopathy, LVNC – left ventricular non-compaction, HR – heart rate (in beats per minute), ms – milliseconds, LA – left atrium, RA – right atrium, RVH – right ventricular hypertrophy, LVH left ventricular hypertrophy, RBBB -right bundle branch block, LBBB- left bundle branch block, LVEF- left ventricular ejection fraction, LVIDd - left ventricular internal diastolic diameter, LVPWd left ventricular posterior wall thickness in diastole, VT – ventricular tachycardia, ICD - implantable cardioverter defibrillator qualification/implantation, HTx- heart transplant qualification, LVAD – left ventricular assist device implantation

**Table S2.** Random Forest regression model in children with cardiomyopathies – specificity and sensitivity

|               | ACC   | sensitivity | specificity | NPV    | PPV    | AUC (95%CI)       |
|---------------|-------|-------------|-------------|--------|--------|-------------------|
| Random forest | 89.5% | 81.8%       | 92.59%      | 81.81% | 92.59% | 0.87 (0.74; 1.00) |

NPV – negative predictive value, PPV positive predictive value, AUC – area under the curve

**Figure S1.** Random Forest model presenting variables associated with unfavorable outcomes in children with cardiomyopathies

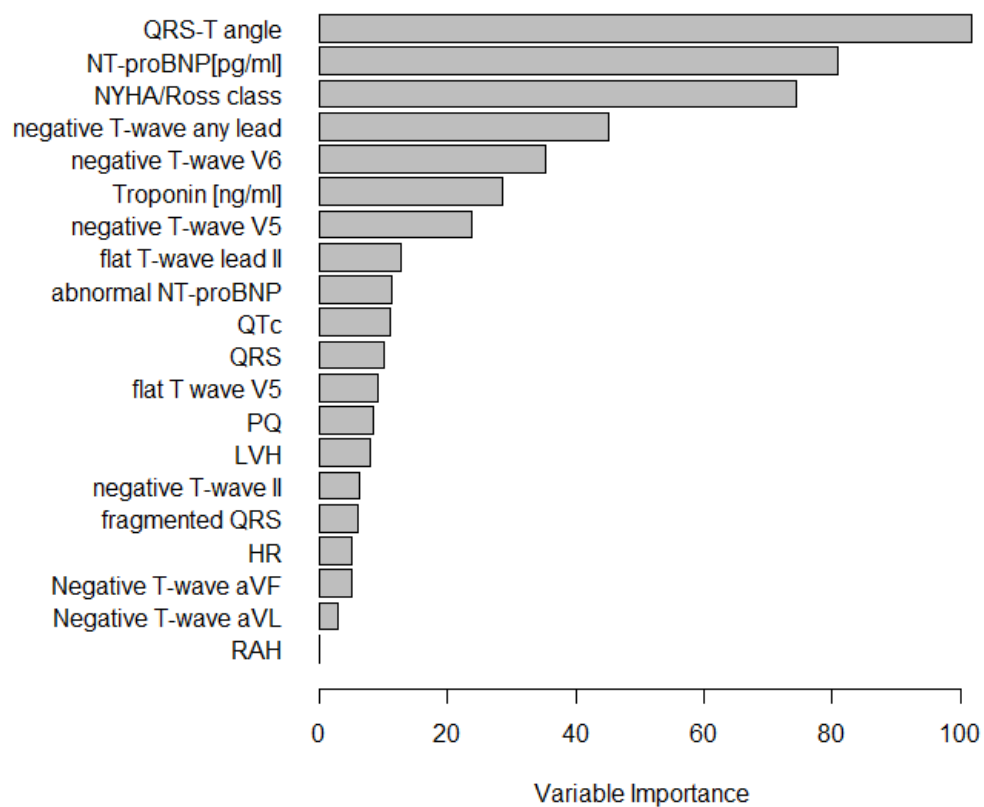

**Table S3.** Comparison between DCM patients with MACE and control group

|                          | DCM with MACE<br><i>n</i> =6 | Control group<br><i>n</i> =19 | p-value          |
|--------------------------|------------------------------|-------------------------------|------------------|
| HR [bpm]                 | 100 (74 – 137)               | 77 (68 – 99)                  | 0.373            |
| PQ [ms]                  | 0.14 ± 0.03                  | 0.13 ± 0.02                   | 0.323            |
| QRS [ms]                 | 0.09 ± 0.02                  | 0.08 ± 0.01                   | 0.296            |
| QTc_mean [ms]            | 0.43 ± 0.04                  | 0.38 ± 0.02                   | <b>0.031</b>     |
| QRS-T [°]                | 133.7 ± 22.82                | 40.6 ± 23.22                  | <b>&lt;0.001</b> |
| Negative T-wave 1 lead   |                              |                               |                  |
| 0                        |                              |                               |                  |
| 1                        | 6 (100%)                     | 17 (90%)                      | 1                |
|                          | 0                            | 2 (10%)                       |                  |
| Negative T-wave ≥2 leads |                              |                               |                  |
| 0                        | 2 (33%)                      | 19 (100%)                     | <b>0.001</b>     |
| 1                        | 4 (67%)                      | 0                             |                  |
| ST depression            |                              |                               |                  |
| 0                        | 6                            | 19 (100%)                     | X                |
| 1                        | 0                            | 0                             |                  |

|                        |                    |                  |                |
|------------------------|--------------------|------------------|----------------|
| ST elevation<br>0<br>1 | 5 (83%)<br>1 (17%) | 19 (100%)<br>0   | 0.534          |
| LVEF (%)               | 27.9 ± 5.78        | 62.2 ± 6.17      | < <b>0.001</b> |
| LVEDD z-score          | 5.50 ± 0.77        | 0.17 ± 0.68      | < <b>0.001</b> |
| LVPWd z-score          | 1.07 ± 0.66        | -0.32 ± 0.93     | <b>0.002</b>   |
| IVSd z-score           | 1.3 (0.9 – 1.4)    | 0.3 (-0.7 – 0.9) | 0.06           |

Data are presented as median and IQR in parenthesis or mean and standard deviation ( $\pm$ ) or percentages 0/1 – absent/present, *n* – number of patients; DCM- dilated cardiomyopathy, MACE – major adverse cardiac event, HR – heart rate (in beats per minute), ms – milliseconds, LVEF- left ventricular ejection fraction, LVIDd - left ventricular internal diastolic diameter, LVPWd left ventricular posterior wall thickness in diastole, IVSd - interventricular septum in diastole

**Table S4.** Comparison between DCM patients with and without ventricular tachycardia

|                                     | no VT<br><i>n</i> =15         | VT<br><i>n</i> =4                  | p-value        |
|-------------------------------------|-------------------------------|------------------------------------|----------------|
| HR [bpm]                            | 97 (83.5 – 110.5)             | 79.5 (64.2 – 95)                   | 0.294          |
| QRS [ms]                            | 70 (70 – 80)                  | 85 (80 – 97.5)                     | <b>0.035</b>   |
| QTc [ms]                            | 401.6 ± 39.02                 | 417.4 ± 33.15                      | 0.471          |
| PQ [ms]                             | 122.7 ± 18.31                 | 152.5 ± 25.00                      | <b>0.015</b>   |
| QRS-T [°]                           | 57.42 ± 32.58                 | 141.73 ± 23.18                     | < <b>0.001</b> |
| Negative T-waves 1 lead<br>0<br>1   | 14 (93%)<br>1 (7%)            | 4 (100%)<br>0                      | 1              |
| Negative T-waves ≥2 leads<br>0<br>1 | 14 (93%)<br>1 (7%)            | 1 (25%)<br>3 (75%)                 | <b>0.022</b>   |
| ST depression<br>0<br>1             | 15 (100%)<br>0                | 4 (100%)<br>0                      | -              |
| ST elevation<br>0<br>1              | 15 (100%)<br>0                | 3 (75%)<br>1 (25%)                 | 0.466          |
| NT-proBNP [pg/ml]                   | 69 (39 – 286)                 | 2232 (1958 – 2799)                 | <b>0.02</b>    |
| Troponin [ng/ml]                    | 5.1 (1.5 – 18.1)              | 25.9 (13.9 – 60.7)                 | 0.234          |
| Ross/NYHA class<br>1<br>2<br>3<br>4 | 13 (87%)<br>0<br>0<br>2 (13%) | 0<br>1 (25%)<br>1 (25%)<br>2 (50%) | <b>0.005</b>   |
| LVEF (%)                            | 41.4 ± 10.1                   | 21.9 ± 7.28                        | <b>0.004</b>   |
| LVIDd z-score                       | 3.11 ± 1.04                   | 5.90 ± 0.54                        | < <b>0.001</b> |

|               |                  |                    |       |
|---------------|------------------|--------------------|-------|
| LVPWd z-score | 0.47 ± 0.595     | 0.93 ± 0.749       | 0.32  |
| IVSd z-score  | 0.30 (-0.05 – 1) | 1.30 (0.94 – 1.32) | 0.292 |

Data are presented as median and IQR in parenthesis or mean and standard deviation ( $\pm$ ),  $n$  – number of patients; 0/1 – absent/present, DCM- dilated cardiomyopathy, VT-ventricular tachycardia, HR – heart rate (in beats per minute), ms – milliseconds, LVEF- left ventricular ejection fraction, LVIDd - left ventricular internal diastolic diameter, LVPWd left ventricular posterior wall thickness in diastole, IVSd - interventricular septum in diastole

**Table S5.** Comparison between HCM patients with and without ventricular tachycardia

|                                | no VT<br>$n=13$   | VT<br>$n=4$         | p-value      |
|--------------------------------|-------------------|---------------------|--------------|
| HR/min                         | 85 (75 – 115)     | 66.5 (57.5 – 79.8)  | 0.1          |
| QRS [ms]                       | 70 (70 – 80)      | 105 (95 – 113)      | <b>0.019</b> |
| QTc [ms]                       | 413.7 ± 32.78     | 425.0 ± 31.08       | 0.552        |
| PQ [ms]                        | 130 (120 – 140)   | 140 (140 – 148)     | 0.149        |
| QRS-T [°]                      | 88.6 ± 28.07      | 132.6 ± 30.02       | <b>0.018</b> |
| Negative T wave in 1 lead      |                   |                     |              |
| 0                              | 10 (83%)          | 4 (100%)            | 1            |
| 1                              | 2 (17%)           | 0                   |              |
| Negative T-wave $\geq 2$ leads |                   |                     |              |
| 0                              | 9                 | 0                   | <b>0.042</b> |
| 1                              | 3                 | 4                   |              |
| ST depression                  |                   |                     |              |
| 0                              | 11                | 2                   | 0.451        |
| 1                              | 2                 | 2                   |              |
| ST elevation                   |                   |                     |              |
| 0                              | 12                | 2                   | 0.234        |
| 1                              | 1                 | 2                   |              |
| NT-proBNP [pg/ml]              | 134 (63 – 2588)   | 1760 (1317 – 2358)  | 0.317        |
| Troponin I [ng/ml]             | 14.4 (2.9 – 48.2) | 86.9 (15.4 – 338.1) | 0.227        |
| Ross/NYHA class                |                   |                     |              |
| 1                              | 8                 | 1                   | 0.392        |
| 2                              | 4                 | 2                   |              |
| 3                              | 1                 | 1                   |              |
| 4                              | 0                 | 0                   |              |
| LVEF %                         | 61 (54 – 65)      | 61 (50 – 63)        | 0.733        |
| LVIDd z-score                  | -1.45 ± 1.76      | -3.03 ± 1.88        | 0.202        |
| LVPWd z-score                  | 2.9 (2.0 – 4.5)   | 9.3 (5.9 – 11.6)    | 0.141        |
| IVSd z-score                   | 8.7 ± 5.56        | 10.8 ± 3            | 0.369        |

Data are presented as median and IQR in parenthesis or mean and standard deviation ( $\pm$ ),  $n$  – number of patients; 0/1 – absent/present, HCM- hypertrophic cardiomyopathy, VT-ventricular tachycardia, HR – heart rate (in beats per minute), ms – milliseconds, LVEF- left ventricular ejection fraction, LVIDd - left ventricular internal diastolic diameter, LVPWd left ventricular posterior wall thickness in diastole, IVSd - interventricular septum in diastole
